# Supplementary material for: Antidiabetic Activity of a Flavonoid-Rich Extract From Sophora davidii (Franch.) Skeels in KK-Ay Mice via Activation of AMP-Activated Protein Kinase
Source: PubMed Central journal article supplement (PMC6055046; doi:10.3389/fphar.2018.00760), 2018-07-16
Supplement: Presentation_1.pdf [file Presentation_1.pdf]

1                   **Antidiabetic activity of a flavonoid-rich extract from**  
2    ***Sophora davidi* (Franch.) Skeels in KK-Ay Mice via activation of**  
3                   **AMP-activated protein kinase**

4    Yun Huang<sup>1</sup>, Ji Hao<sup>1</sup>, Di Tian<sup>2</sup>, Yanzhang Wen<sup>1</sup>, Ping Zhao<sup>2</sup>, Hao Chen<sup>3</sup>, Yibin Lv<sup>1</sup>,  
5    Xinzhou Yang<sup>1,\*</sup>

6    <sup>1</sup>School of Pharmaceutical Sciences, South-Central University for Nationalities, Wuhan  
7    430074, China

8    <sup>2</sup>School of Life Sciences, South-Central University for Nationalities, 182 Min-Zu Road,  
9    Wuhan 430074, China

10   <sup>3</sup>College of Pharmacy, Guangxi University of Chinese Medicine, Nanning 530001, China

11   \*Corresponding authors at: School of Pharmaceutical Sciences, South-Central University  
12   for Nationalities, 182 Minzu Road, Wuhan 430074, China, Tel.: +86 27 67841196, Fax:  
13   +86 27 67841196.

14   E-mail addresses: xzyang@mail.scuec.edu.cn (X.Z. Yang).

15  
16  
17  
18  
19  
20  
21  
22  
23  
24  
25  
26  
27  
28  
29  
30  
31  
32

|    |                                                                             |
|----|-----------------------------------------------------------------------------|
| 33 | <b>Supporting Information Contents:</b>                                     |
| 34 | <b>S1. Screening methodology validation</b>                                 |
| 35 | <b>S2. Changes of FBG levels, body weight and food intake of KK-Ay mice</b> |
| 36 | <b>during 4 weeks of treatment</b>                                          |
| 37 | <b>S3. <sup>1</sup>H-NMR spectrum of Compound 1</b>                         |
| 38 | <b>S4. <sup>13</sup>C-NMR spectrum of Compound 1</b>                        |
| 39 | <b>S5. ESIMS spectrum of Compound 1 (Positive and negative mode)</b>        |
| 40 | <b>S6. <sup>1</sup>H-NMR spectrum of Compound 2</b>                         |
| 41 | <b>S7. <sup>13</sup>C-NMR spectrum of Compound 2</b>                        |
| 42 | <b>S8. ESIMS spectrum of Compound 2 (Positive and negative mode)</b>        |
| 43 | <b>S9. <sup>1</sup>H-NMR spectrum of Compound 3</b>                         |
| 44 | <b>S10. <sup>13</sup>C-NMR spectrum of Compound 3</b>                       |
| 45 | <b>S11. ESIMS spectrum of Compound 3 (Positive and negative mode)</b>       |
| 46 | <b>S12. <sup>1</sup>H-NMR spectrum of Compound 4</b>                        |
| 47 | <b>S13. <sup>13</sup>C-NMR spectrum of Compound 4</b>                       |
| 48 | <b>S14. ESIMS spectrum of Compound 4 (Positive and negative mode)</b>       |

49

50

51

52

53

54

55 **S1. Screening methodology validation**

56 There have several papers reported that IRAP-mOrange and GLUT4-eGFP could be  
57 applied to detect the GLUT4 translocation in L6 (Wang et al., 2009; Zhou et al., 2016;  
58 Huang et al., 2016) and 3T3-L1 cells (Bai et al., 2007; Jiang et al. 2008). In order to  
59 validate the feasibility of our IRAP translocation assay for discovering potential  
60 hypoglycemic agents, we have observed the effects when the GLUT4-eGFP or  
61 IRAP-marked L6 cells treated with insulin and berberine which are definitely  
62 pharmacodynamic GLUT4 agonists. L6 cells which stably express IRAP-mOrange and  
63 GLUT4-eGFP were cultured in MEM- $\alpha$  supplemented with 10% fetal bovine serum and  
64 1% antibiotics (100 U/mL penicillin and 100  $\mu$ g/mL streptomycin) at 37 oC in 5% CO<sub>2</sub>.  
65 L6 cells was seeded in 48 well plates, and incubated until 100% confluence and then  
66 starved in serum-free  $\alpha$ -MEM for 2 h. Afterwards, L6 cells were treated with insulin (10  
67 nM) and berberine (5  $\mu$ M). The cells were taken photos with a laser-scanning confocal  
68 microscope LSM 510 (Carl Zeiss, Jena, Germany) to supervise the IRAP-mOrange and  
69 GLUT4-eGFP translocation. And the images were captured with 555 nm excitation laser  
70 every 10 seconds in first 5 minutes and then every 5 minutes in later 30 minutes. During  
71 the experiment, as time went on, we could observe the green and red fluorescence  
72 enhanced significantly after treating with insulin and berberine in L6 cells (Fig. 1). The  
73 results showed that GLUT4 and IRAP simultaneously translocated onto the plasma  
74 membrane in 30 min when adding the GLUT4 agonist. GLUT4 has mainly been recruited  
75 to the PM throughout to the GLUTs storage vesicles (GSV). Three main proteins stored in  
76 GSV are GLUT4, IRAP, and Sortilin (Shi et al., 2005). It was reported that IRAP and  
77 GLUT4 displayed a strong colocalization (Kumar et al., 2010; Rubin et al., 2009) in many  
78 researches. Thus, detecting the IRAP can indirectly reflect the situation of GLUT4. So our  
79 results could be explained that detecting the IRAP-mOrange fluorescence could indirectly  
80 reflect the GLUT4 translocation. As the red fluorescence is more conspicuous than green  
81 fluorescence for observation, so we choose the IRAP-mOrange fluorescence assay for  
82 reflecting GLUT4 translocation.

83  
84

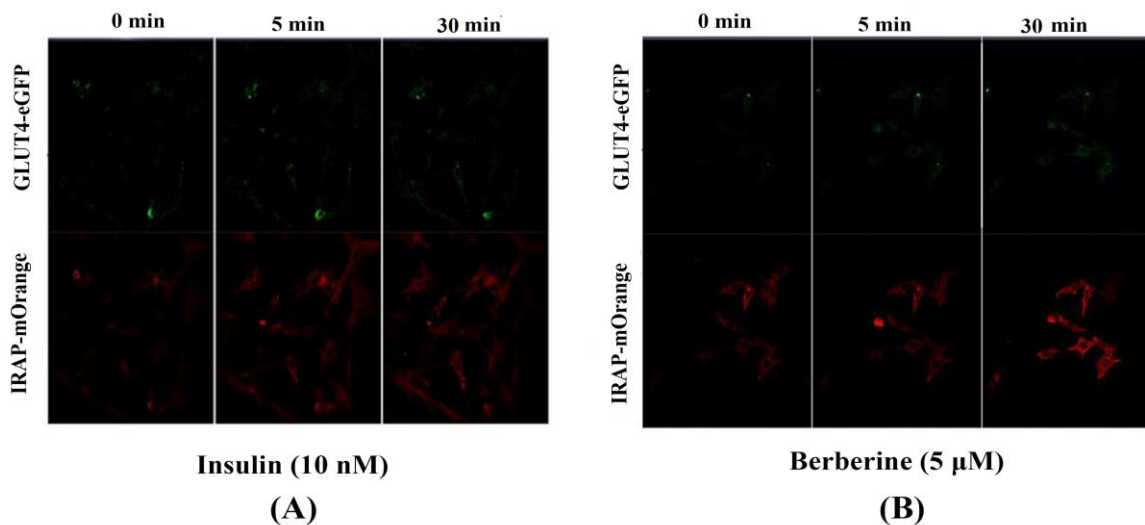

85  
86

**Figure S1** L6 cells were infected with IRAP-mOrange and GLUT4-eGFP in order to detect

87 externalized GLUT4 translocation by confocal microscopy. (A) Confocal images in L6  
88 cells incubated in the absence (0 min) or presence of insulin for 5min, 30 minutes. (B)  
89 Confocal images in L6 cells incubated in the absence (0 min) or presence of berberine for 5  
90 min, 30 minutes.

## 91 **References**

- 92 Bai, L., Wang, Y., Fan, J., Chen, Y., Ji, W., Qu, A., et al. (2007). Dissecting multiple steps  
93 of GLUT4 trafficking and identifying the sites of insulin action. *Cell. Metab.* 5, 47-57.  
94 doi: 10.1016/j.cmet.2006.11.013
- 95 Huang, M., Zhao, P., Xiong, M. R., Zhou, Q., Zheng, S. J., Ma , X. H., et al. (2016).  
96 Antidiabetic activity of perylenequinonoid-rich extract from *Shiraia bambusicola* in  
97 KK-Ay Mice with Spontaneous Type 2 Diabetes Mellitus. *J. Ethnopharmac.* 191,  
98 71-81. doi: 10.1016/j.jep.2016.06.018
- 99 Jiang, L., Fan, J., Bai, L., Wang, Y., Chen, Y., Yang, L., et al. (2008). Direct  
100 quantification of fusion rate reveals a distal role for AS160 in insulin-stimulated fusion  
101 of GLUT4 storage vesicles. *J. Biol. Chem.* 283, 8508-8516. doi:  
102 10.1074/jbc.M708688200
- 103 Kumar, A., Lawrence, Jr., Jung, D. Y., Ko, H. J., Keller, S. R., Kim, J. K., et al. (2010).  
104 Fat cellspecific ablation of rictor in mice impairs insulin-regulated fat cell and  
105 whole-body glucose and lipidmetabolism. *Diabetes.* 59, 1397–1406. doi:  
106 10.2337/db09-1061
- 107 Rubin, B. R., and Bogan, J. S. (2009). Intracellular retention and insulinstimulated  
108 mobilization of GLUT4 glucose transporters. *Vitam. Horm.* 80, 155–192. doi:  
109 10.1016/S0083-6729(08)00607-9
- 110 Shi, J., and Kandrор, K. V. (2005). Sortilin is essential and sufficient for the formation of  
111 glut4 storage vesicles in 3T3-L1 adipocytes. *Dev. Cell.* 9, 99–108. doi:  
112 10.1016/j.devcel.2005.04.004
- 113 Wang, X., Qu, F., Chen, Z., Liang, T., and Qu, A. (2009). Labeling and imaging of  
114 GLUT4 in live L6 cells with quantum dots. *Biochem. Cell. Biol.* 87, 687-694. doi:  
115 10.1139/o09-041
- 116 Zhou, Q., Yang, X. Z., Xiong, M. R., Xu, X. L., Zhen, L., Chen, W. W., et al. (2016).  
117 Chloroquine Increases Glucose Uptake via Enhancing GLUT4 Translocation and  
118 Fusion with the Plasma Membrane in L6 Cells. *Cell Physiol. Biochem.* 38, 2030-2040.  
119 doi: 10.1159/000445562

120

121

122 **S2. Changes of FBG levels, body weight and food intake of KK-Ay mice**  
 123 **during 4 weeks of treatment.**

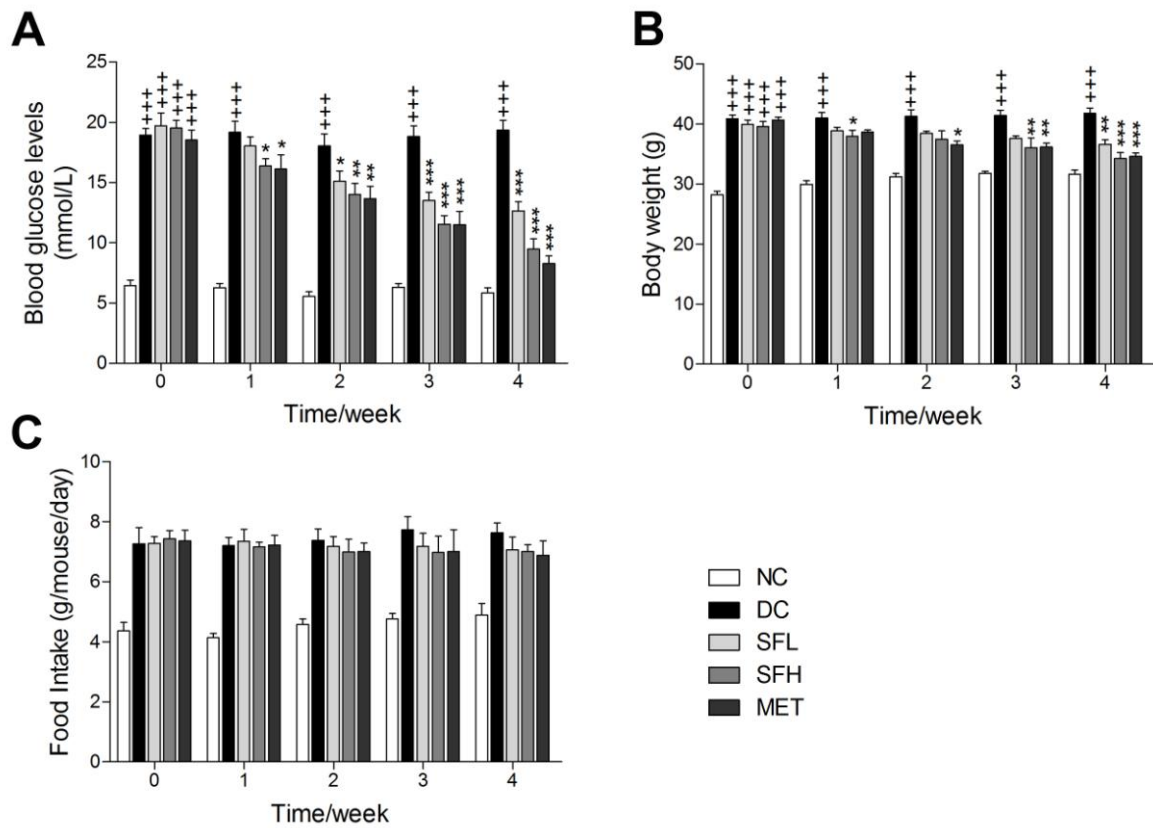

124  
 125 **Figure S2** The dynamic changes of FBG levels (A), body weight (B) and food intake (C)  
 126 of KK-Ay mice during 4 weeks of treatment with SD-FRE. Data are means  $\pm$  SEM (n = 8).  
 127  $+++P < 0.001$  versus NC group,  $*P < 0.05$ ,  $**P < 0.01$ ,  $***P < 0.001$  versus DC group.

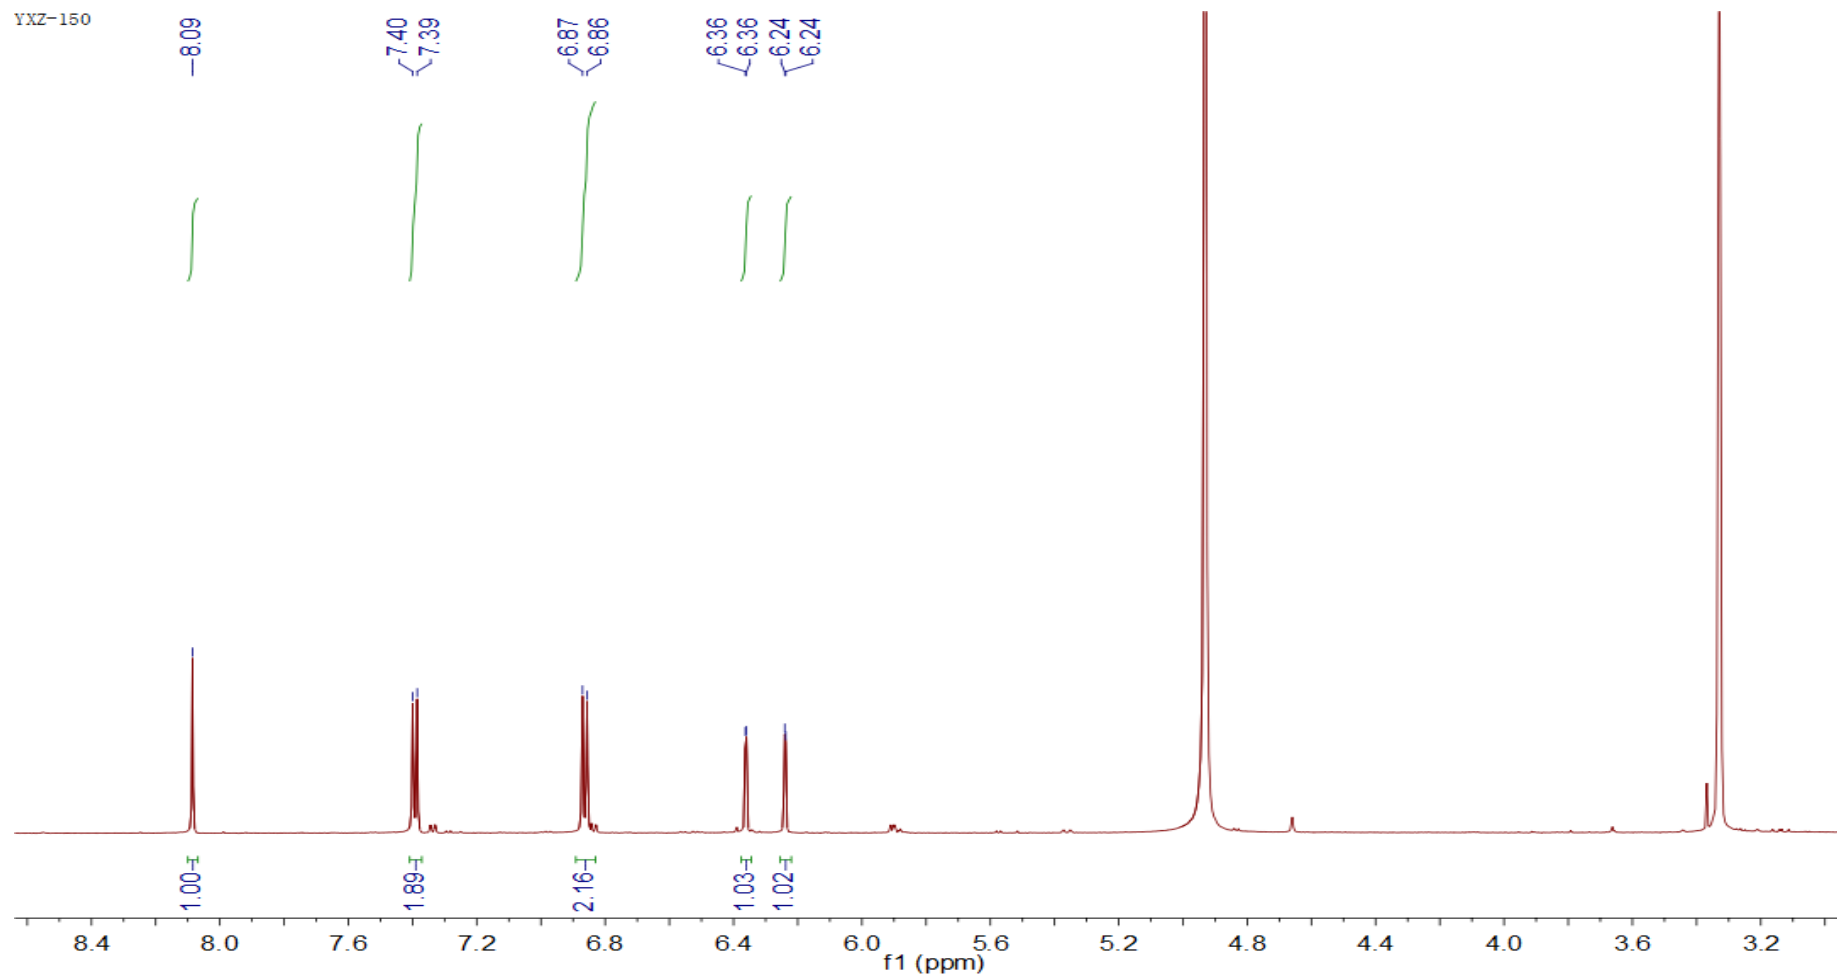

128

129

**S3. <sup>1</sup>H-NMR spectrum of apigenin**

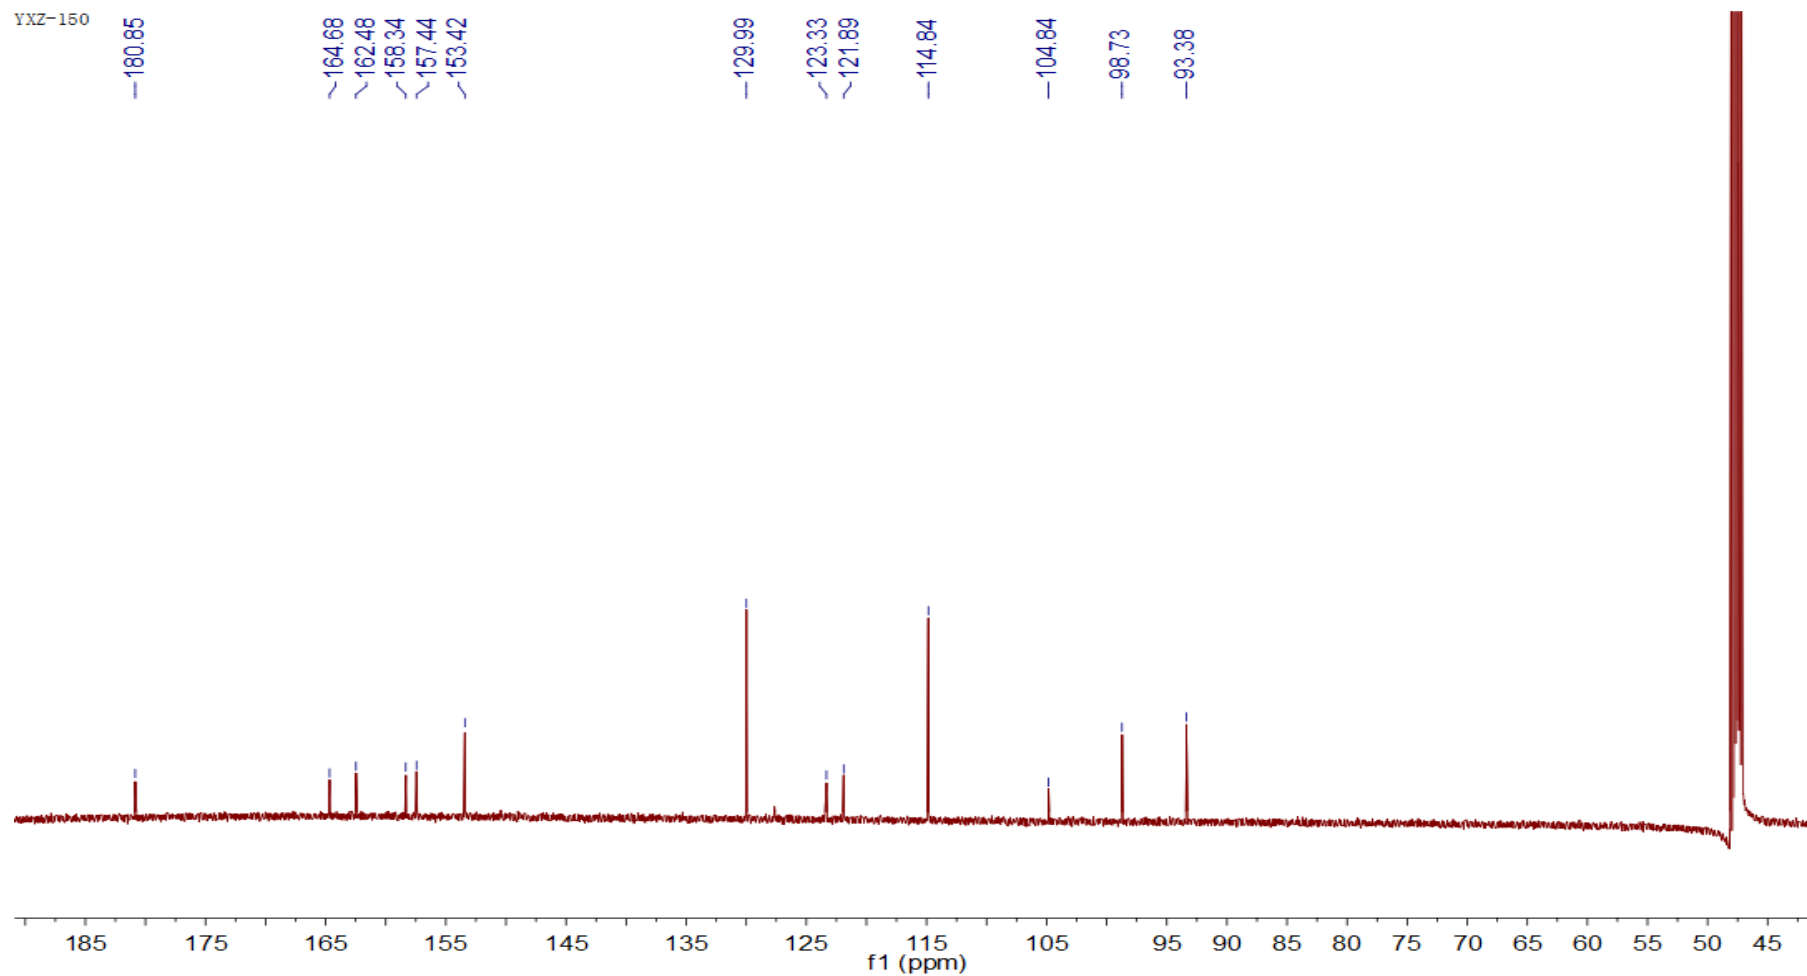

S4.  $^{13}\text{C}$ -NMR spectrum of apigenin

130

131

132

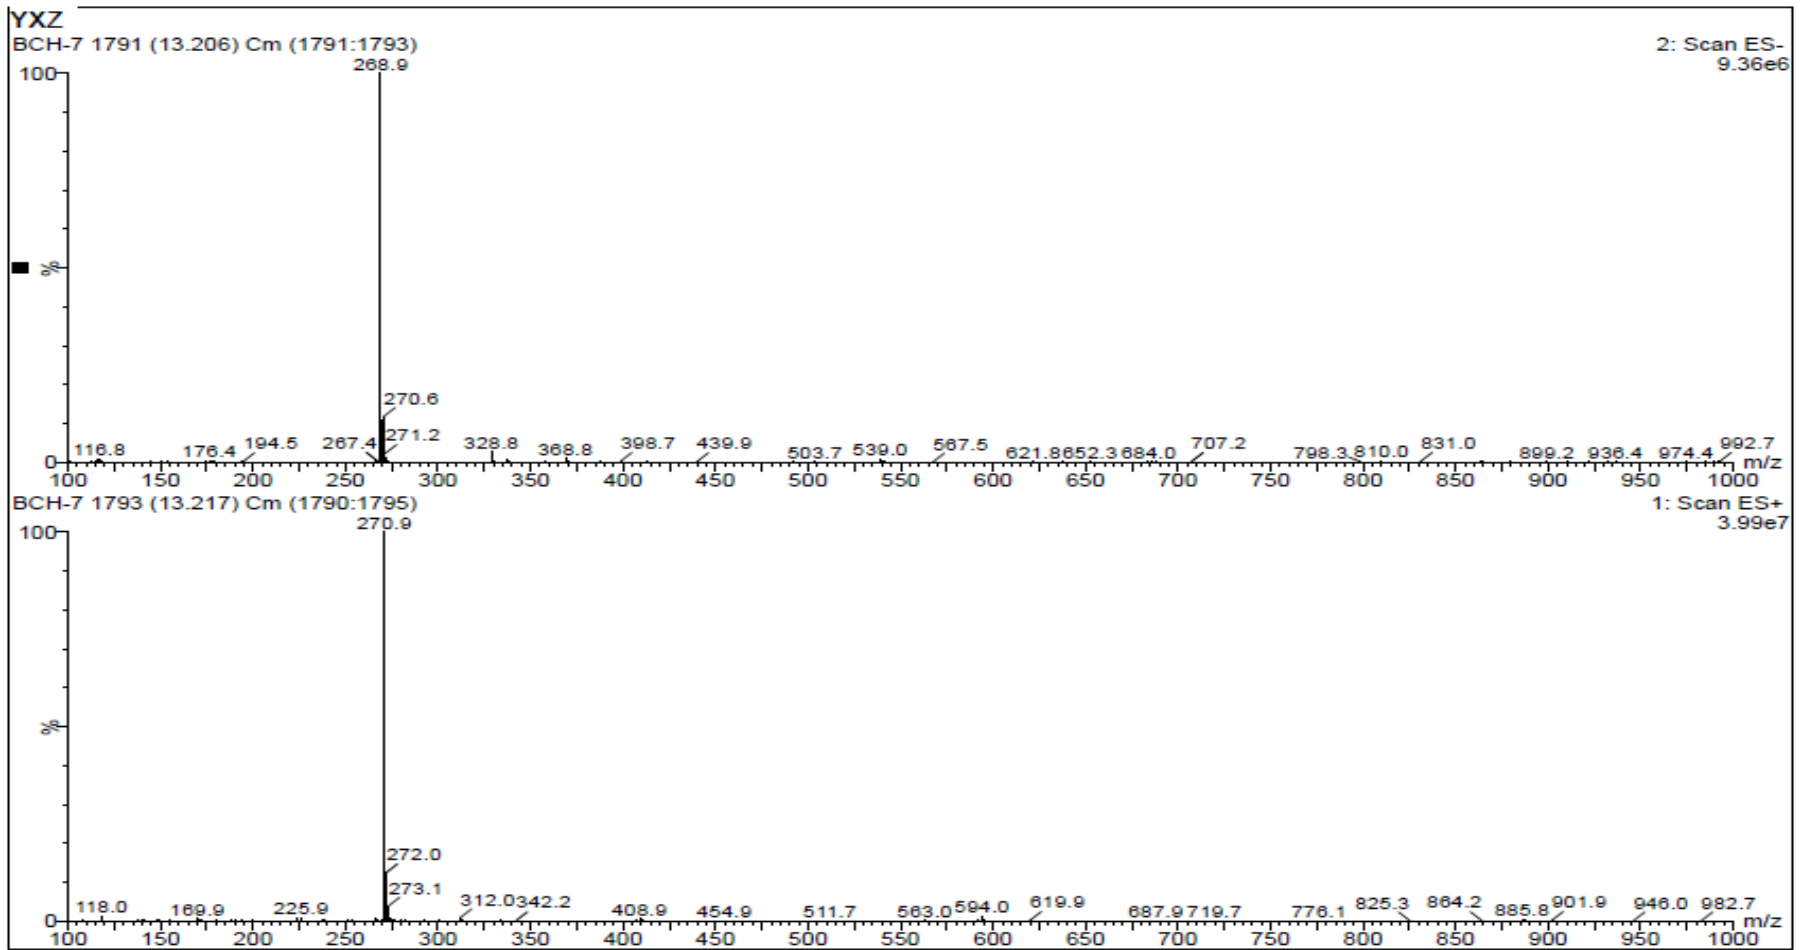

133

134

**S5. ESIMS spectrum of apigenin (Positive and negative mode)**

135



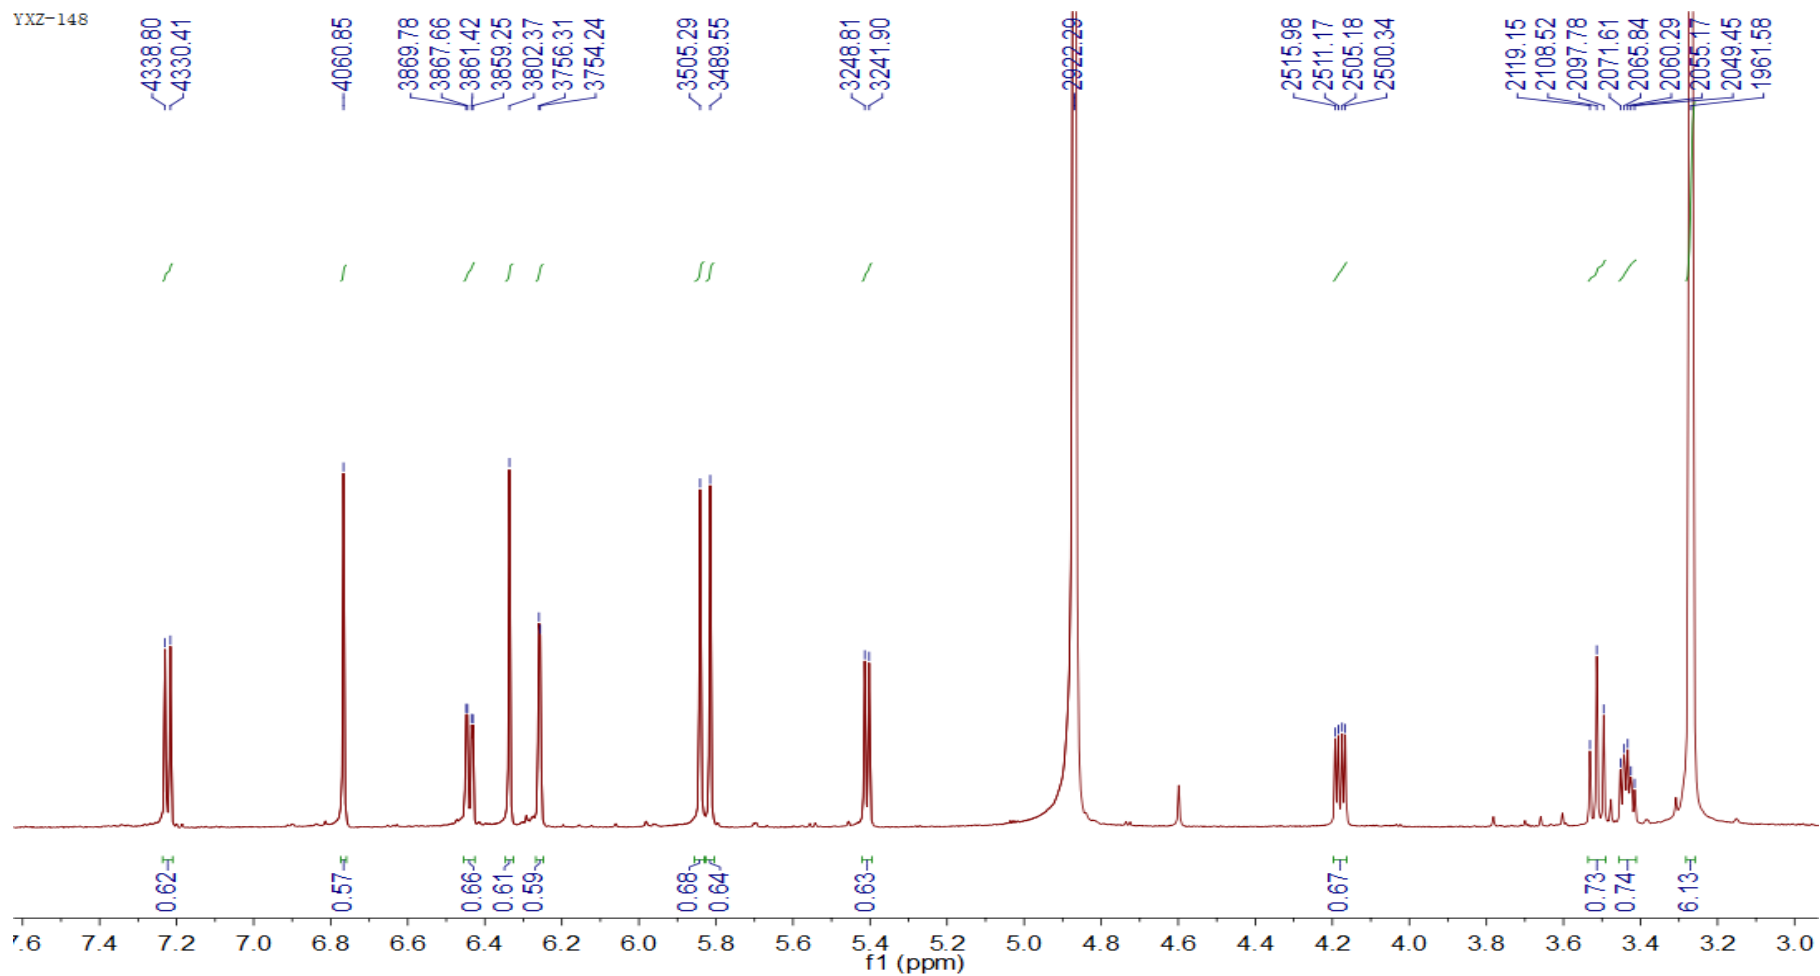

S6.  $^1\text{H-NMR}$  spectrum of maackiain

136

137

138

YZZ-148

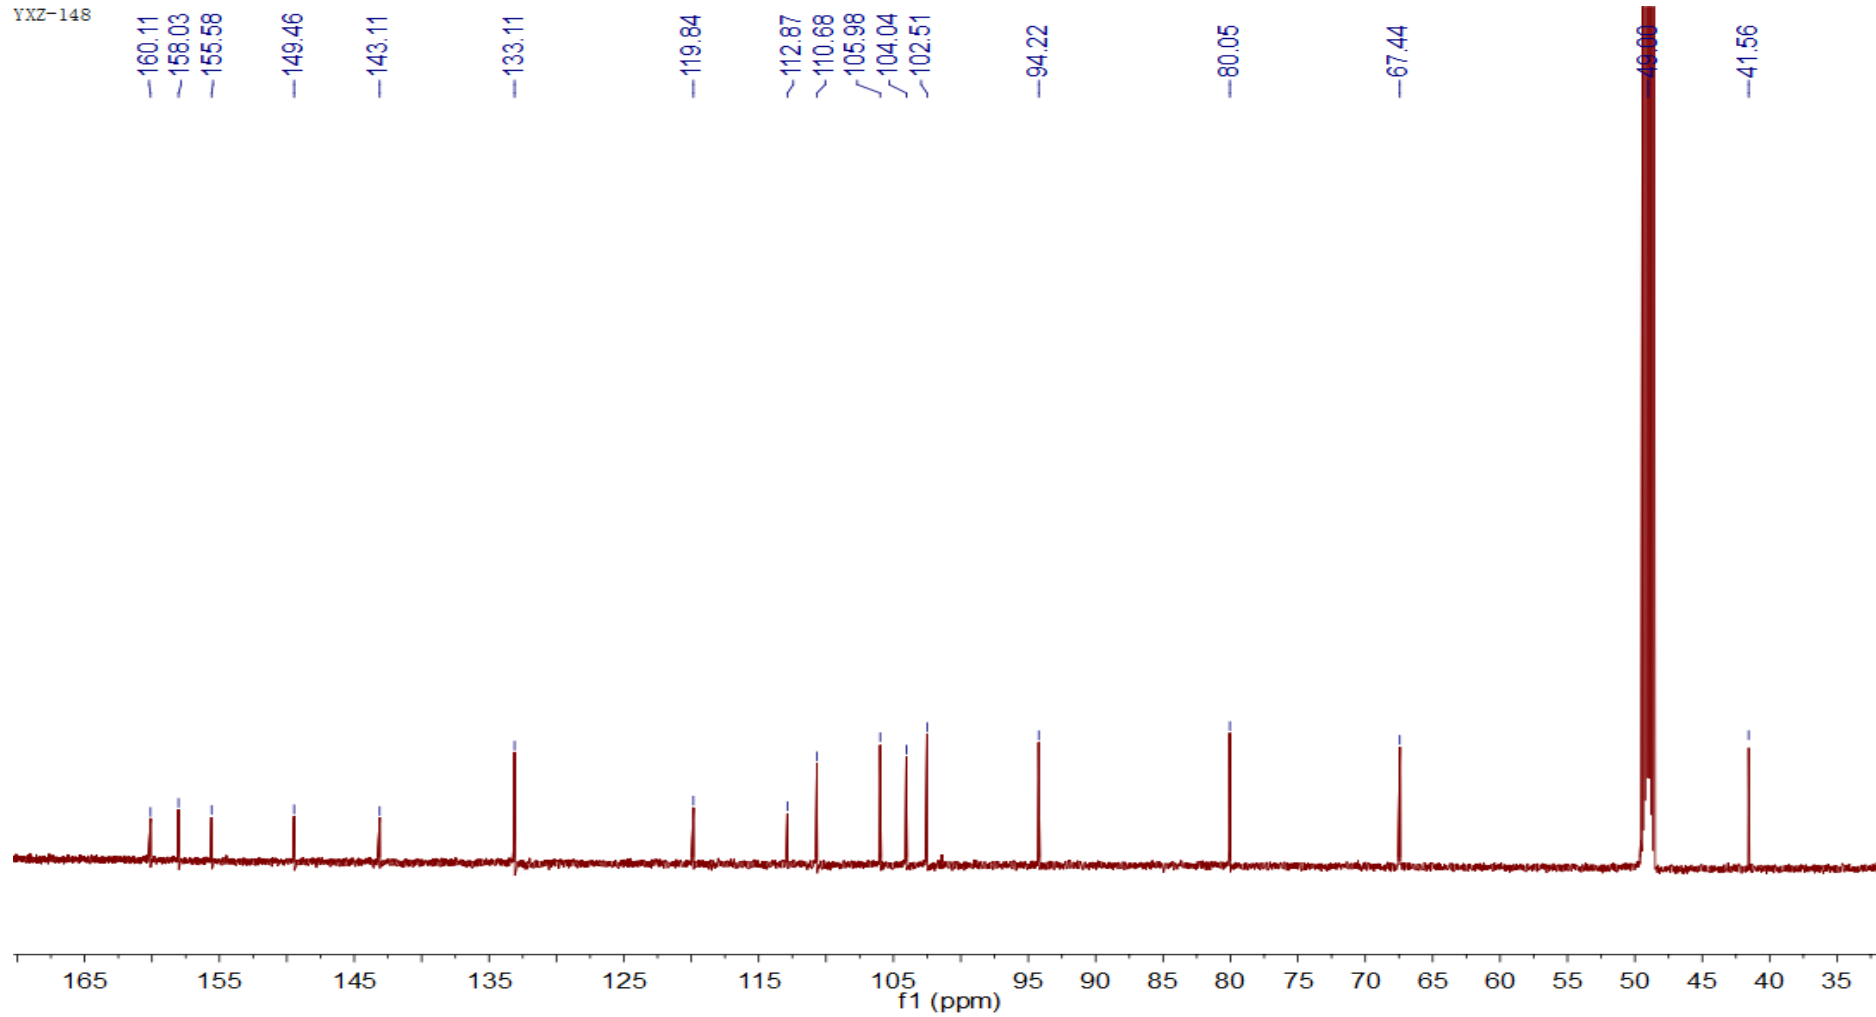

S7. <sup>13</sup>C-NMR spectrum of maackiain

139

140

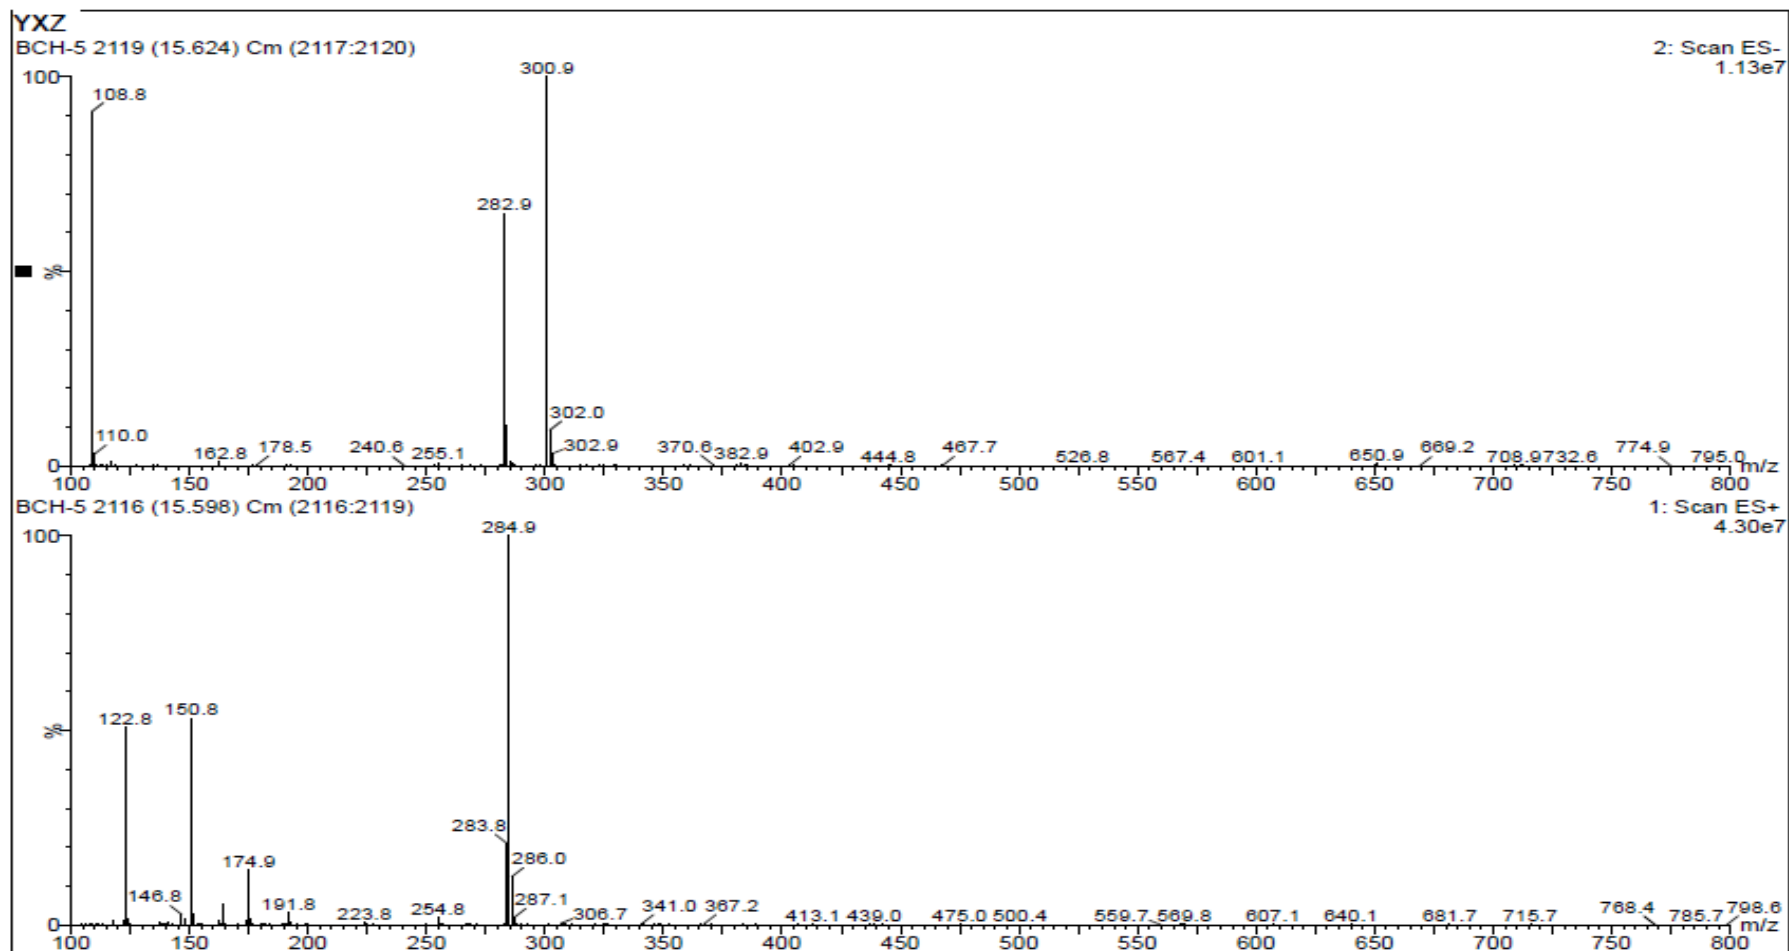

141

142

**S8. ESIMS spectrum of maackiain (Positive and negative mode)**

143

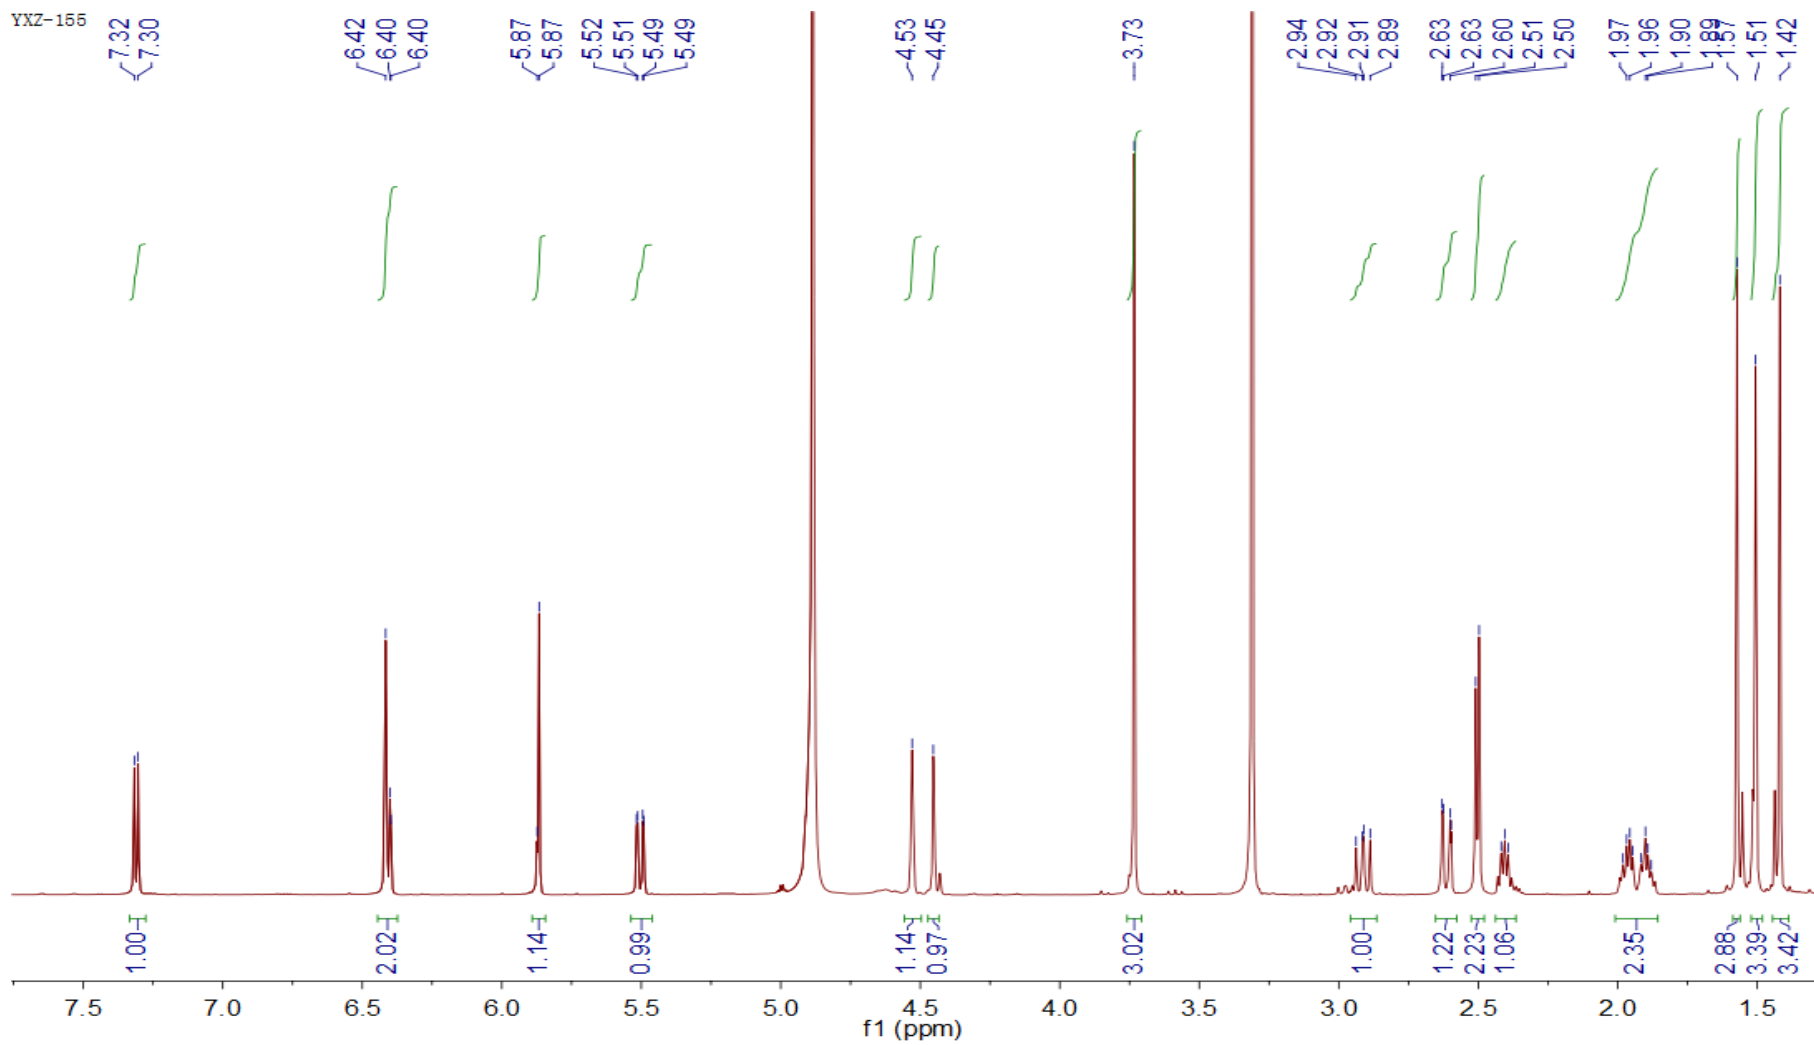

S9. <sup>1</sup>H-NMR spectrum of leachianone A

144

145

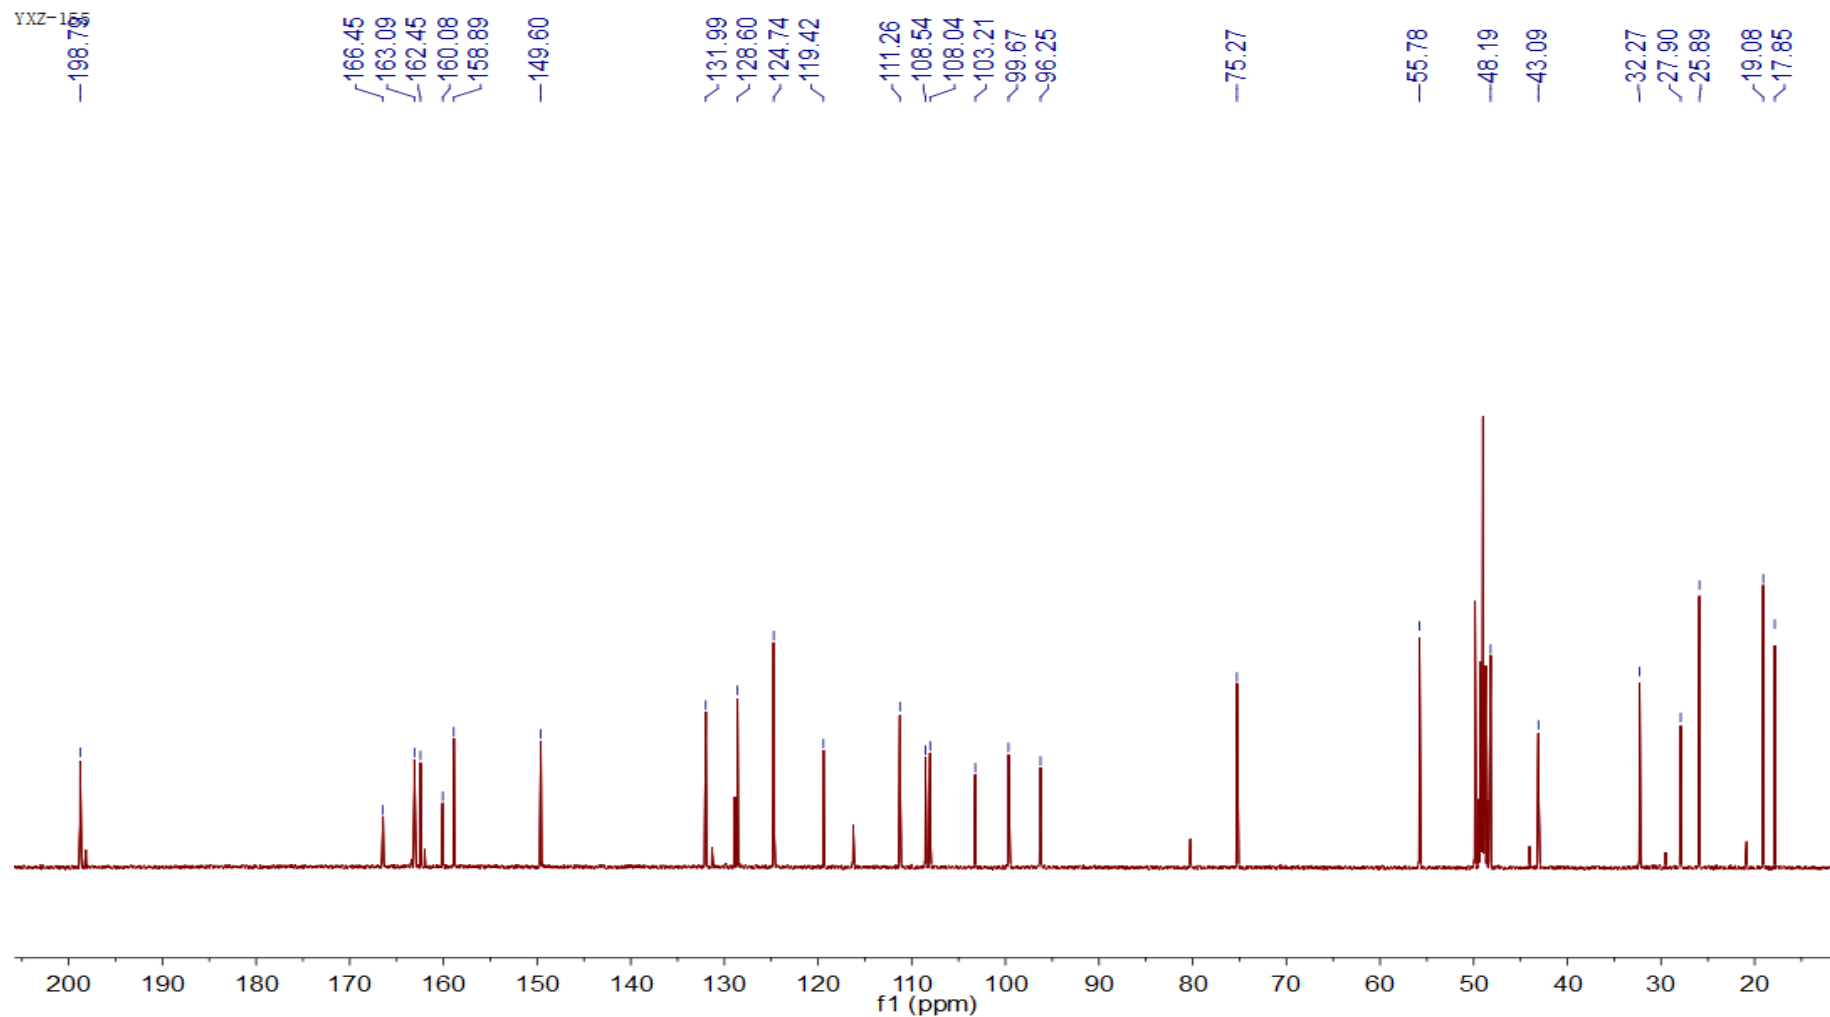

146

147

S10.  $^{13}\text{C}$ -NMR spectrum of leachianone A

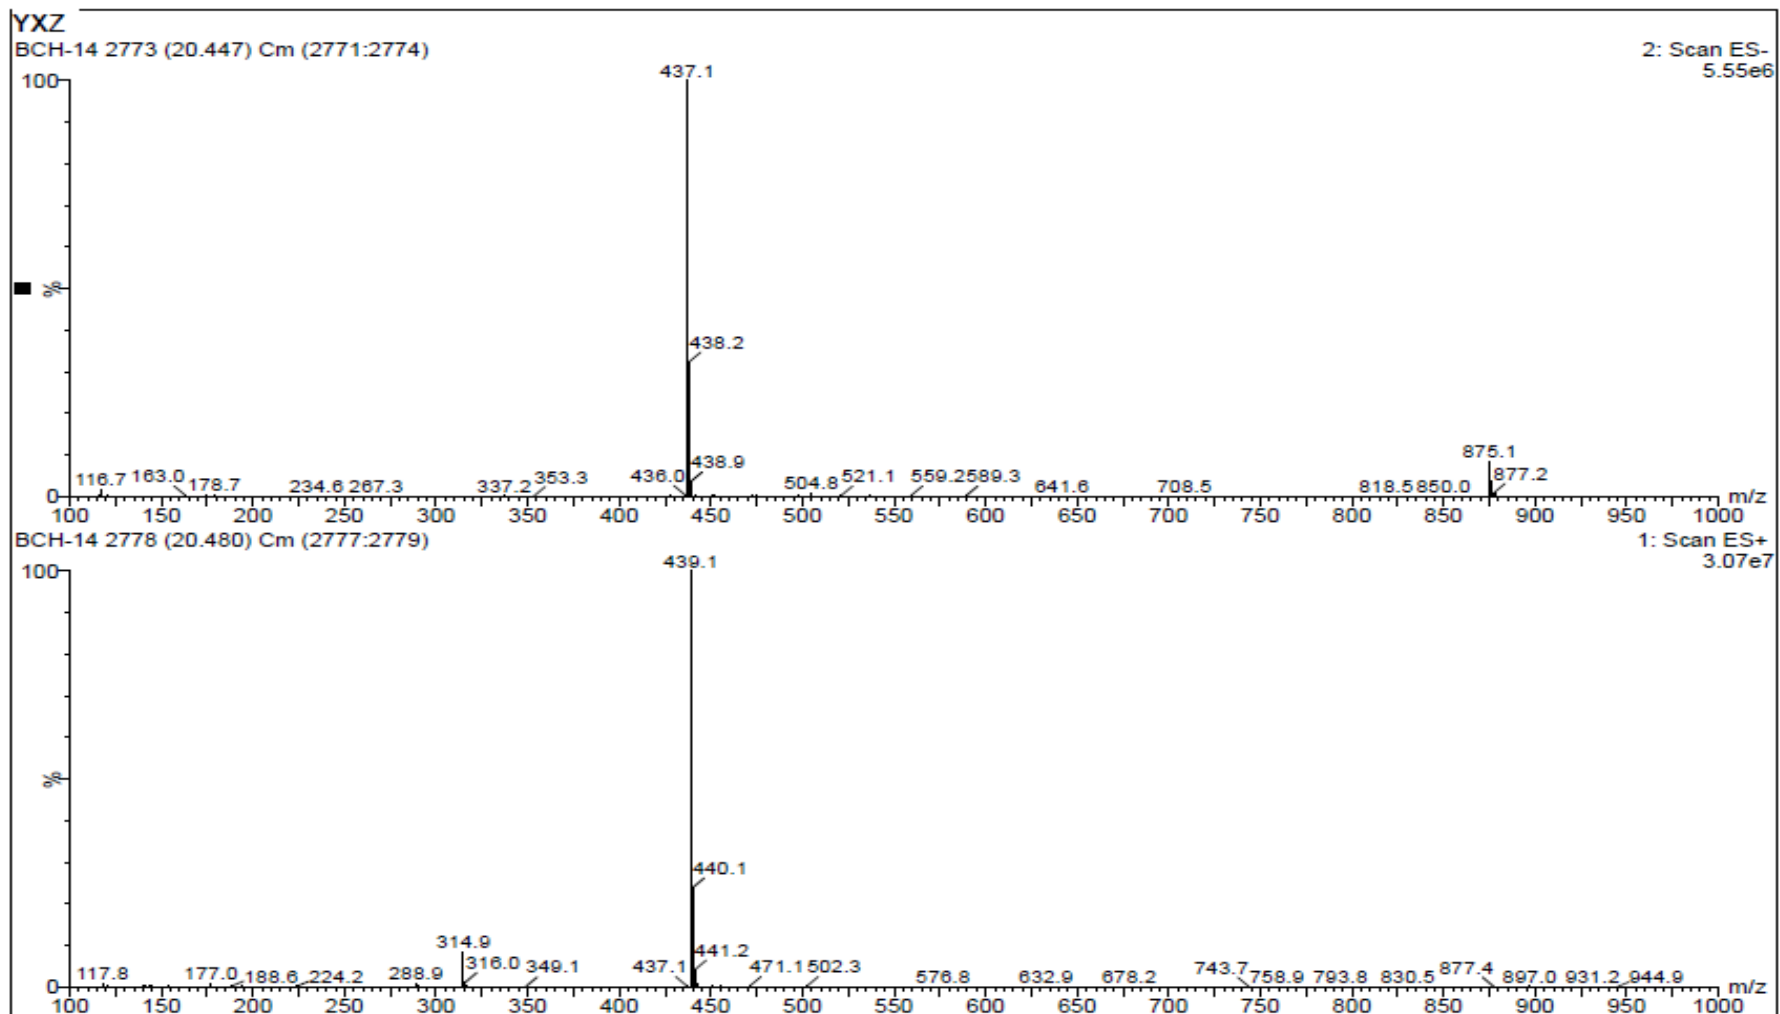

**S11. ESIMS spectrum of leachianone A (Positive and negative mode)**

148

149

150

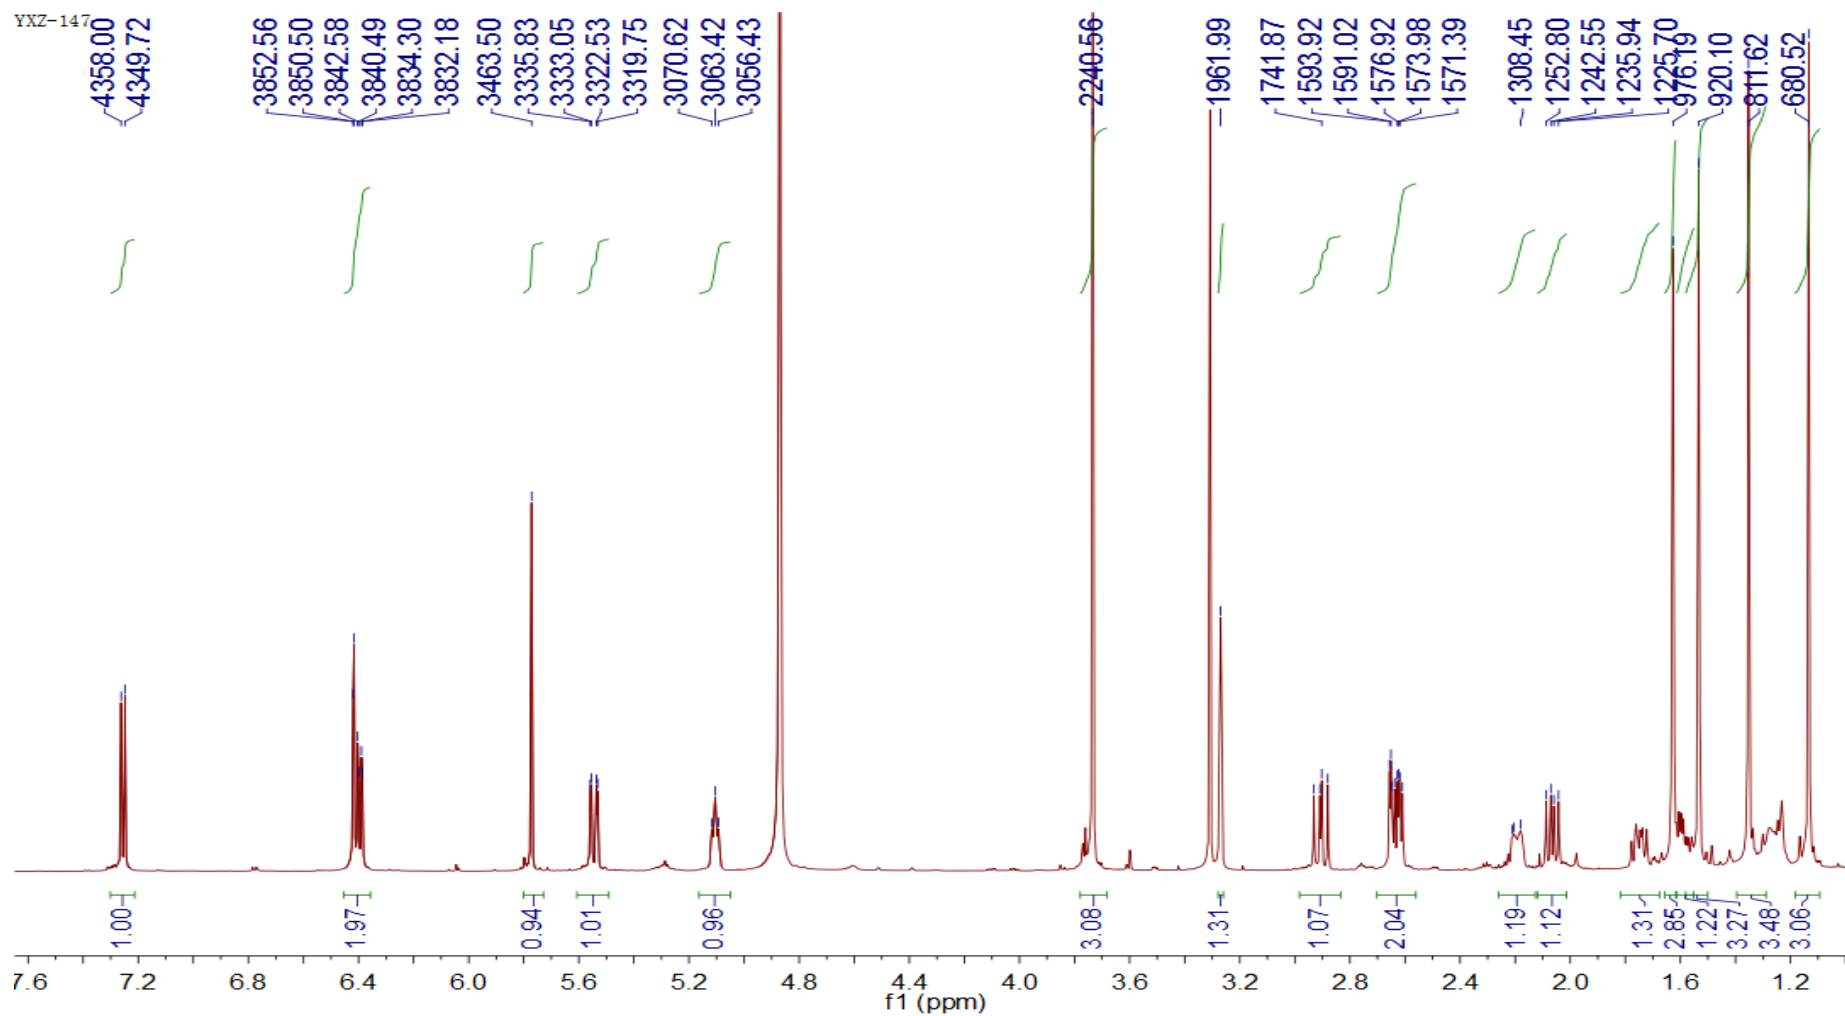

S12. <sup>1</sup>H-NMR spectrum of leachianone B

151

152

153

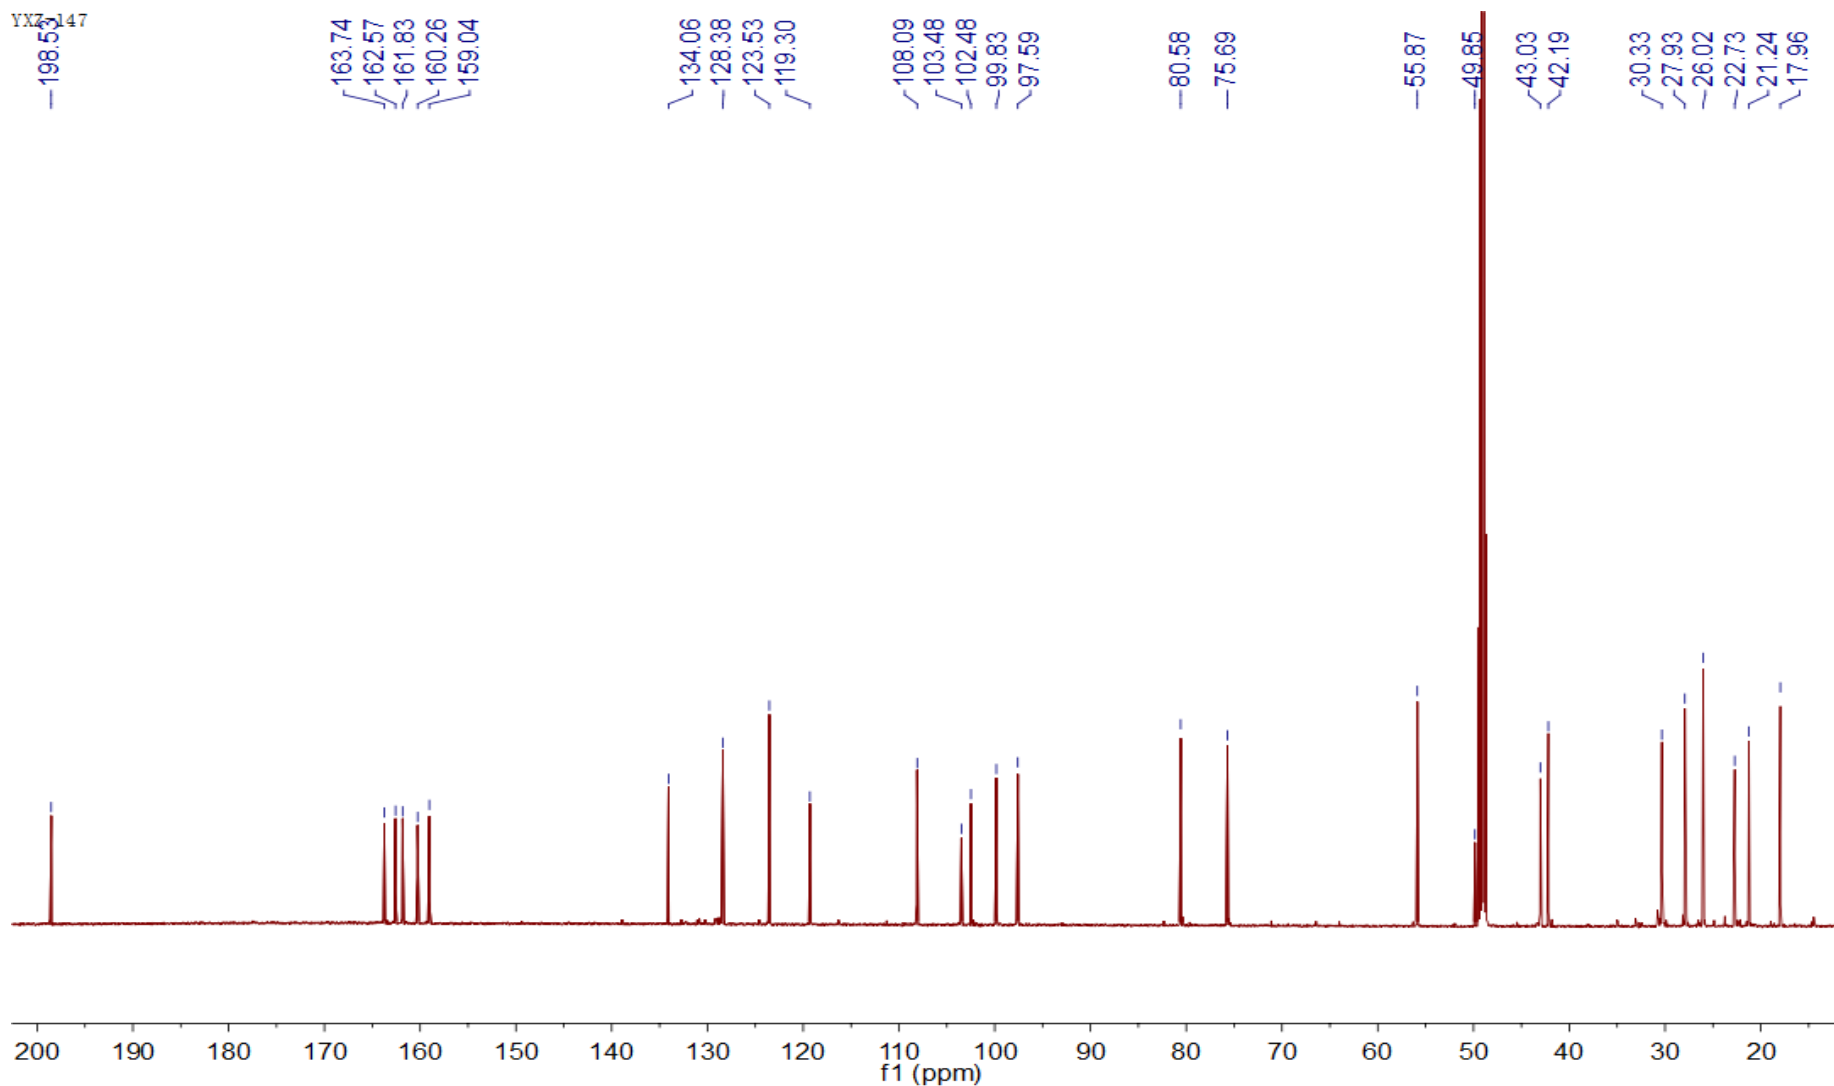

154

155

S13.  $^{13}\text{C}$ -NMR spectrum of leachianone B



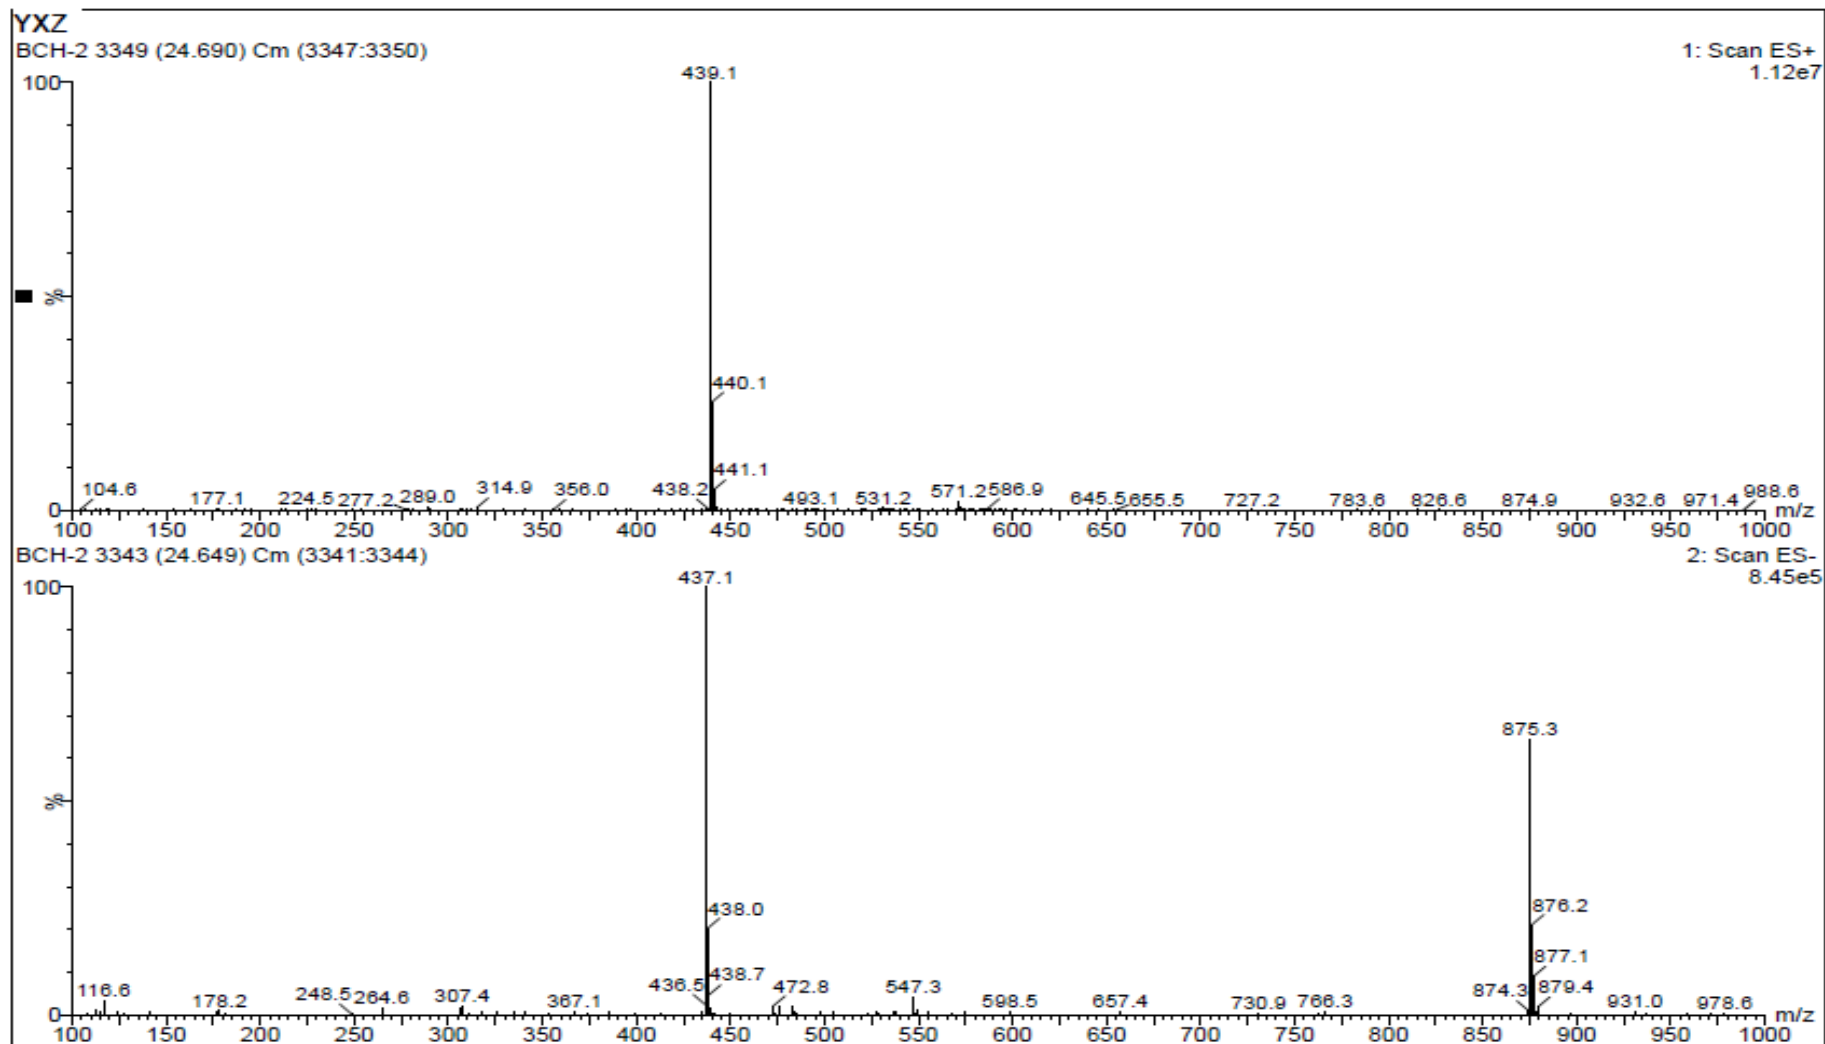

156

157

**S14. ESIMS spectrum of leachianone B (Positive and negative mode)**
